# Supplementary material for: Hierarchical Cu–Co–Ni nanostructures electrodeposited on carbon nanofiber modified glassy carbon electrode: application to glucose detection
Source: Royal Society of Chemistry journal article supplement (doi:10.1039/c3ay41170b), 2013-01-01
Supplement: c3ay41170b.pdf [file c3ay41170b.pdf]

## Supporting Information

# Hierarchical Cu-Co-Ni Nanostructures Electrodeposited on Carbon Nanofiber Modified Glassy Carbon Electrode: Application to Glucose Detection

Hongyu Liu\*, Xingping Lu\*, Dejian Xiao\*, Minxian Zhou\*, Dujian Xu\*, Lanlan Sun\*\*, Yonghai Song\*,<sup>1</sup>

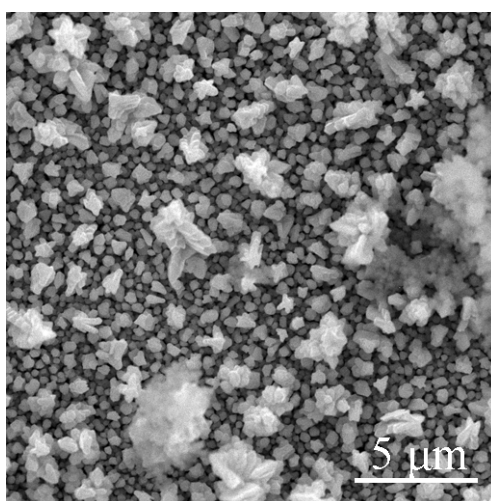

Fig. S1 SEM of Cu-Co-Ni NSs/GCE.

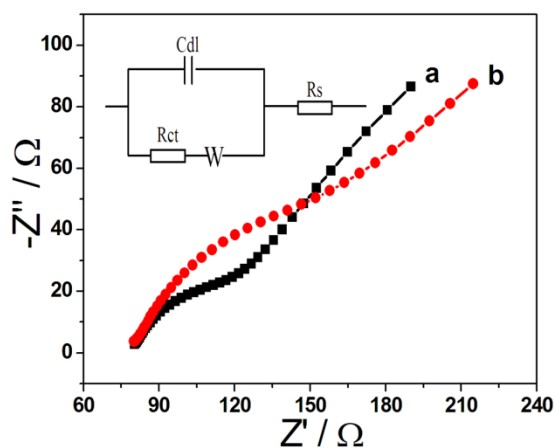

Fig. S2 EIS of Cu-Co-Ni NSs/CNFs/GCE (a) and Cu-Co-Ni NSs/GCE (b).

<sup>1</sup> Corresponding author: Tel/Fax: +86 791 88120862. E-mail: yhsonggroup@hotmail.com (Y. Song).
